# Supplementary material for: Distinctive pattern of temporal atrophy in patients with frontotemporal dementia and the I383V variant in TARDBP
Source: PubMed Central journal article supplement (PMC8223666; doi:10.1136/jnnp-2020-325150), 2021-01-15
Supplement: jnnp-2020-325150supp002.pdf [file jnnp-2020-325150supp002.pdf]

|                                        | 1A      | 1C      | 1D      | 1E      | 1F <sup>a</sup>    | 1G    | 2H    | 3K       | 4L      | 4M    | 5O     | 6P                 | 7Q     |
|----------------------------------------|---------|---------|---------|---------|--------------------|-------|-------|----------|---------|-------|--------|--------------------|--------|
| <b>Gender</b>                          | F       | F       | F       | M       | F                  | M     | M     | F        | M       | M     | M      | M                  | M      |
| <b>Age at onset</b>                    | 55      | 69      | 55      | 44      | 58                 | 46    | 42    | 47       | 54      | 65    | 49     | 60                 | 49     |
| <b>Disease duration (years)</b>        | 8       | 10      | 2       | 10      | 23*                | 8*    | 11    | 11       | 5       | 7*    | 17*    | 8                  | 12     |
| <b>Clinical diagnosis</b>              | bvFTD   | bvFTD   | bvFTD   | bvFTD   | bvFTD              | svPPA | bvFTD | bvFTD    | bvFTD   | bvFTD | svPPA  | bvFTD              | bvFTD  |
| <b>Clinical symptoms</b>               |         |         |         |         |                    |       |       |          |         |       |        |                    |        |
| <i>Behavioral disinhibition</i>        | ++      | ++      | +       | +       | +                  | -     | ++    | -        | +       | ++    | +      | -                  | +      |
| <i>Apathy/loss of sympathy</i>         | +       | +       | -       | +       | ±                  | +     | ++    | +        | ±       | ±     | ++     | +                  | -      |
| <i>Compulsivity/stereotypes</i>        | -       | -       | -       | +       | +                  | +     | +     | +        | +       | -     | +      | +                  | -      |
| <i>Hyperorality/dietary changes</i>    | +       | -       | -       | -       | +                  | -     | -     | -        | ++      | -     | ++     | -                  | -      |
| <i>Executive deficits</i>              | +       | +       | +       | -       | +                  | -     | +     | -        | -       | +     | ±      | -                  | +      |
| <i>Episodic memory deficits</i>        | -       | +       | -       | +       | -                  | -     | -     | -        | +       | -     | +      | +                  | -      |
| <i>Impaired confrontation naming</i>   | +       | ++      | ±       | +       | +                  | ++    | +     | ++       | +       | -     | +      | +                  | +      |
| <i>Impaired language comprehension</i> | +       | +       | +       | -       | ±                  | ++    | +     | -        | -       | -     | +      | ±                  | -      |
| <i>Prosopagnosia</i>                   | +       | +       | -       | -       | +                  | +     | +     | -        | +       | -     | -      | +                  | +      |
| <b>Family history<sup>b</sup></b>      |         |         |         |         |                    |       |       |          |         |       |        |                    |        |
| <i>Goldman score</i>                   | 1       | 3       | 1       | 3       | 3                  | 2     | 4     | 5        | 5       | 4     | 4      | 2                  | 3      |
| <i>Psychiatric Family history</i>      | -       | -       | -       | -       | +                  | +     | -     | -        | +       | -     | -      | -                  | +      |
| <b>Neuroimaging</b>                    |         |         |         |         |                    |       |       |          |         |       |        |                    |        |
| <i>Temporal atrophy at first scan</i>  | R>L (3) | R>L (5) | L>R (2) | L>R (5) | S (6) <sup>c</sup> | S (6) | S (8) | R>L (8)  | R>L (4) | S (6) | R>L(5) | S (5) <sup>c</sup> | S (10) |
| <i>Temporal atrophy at follow-up</i>   |         | S (7)   |         | S (6)   |                    |       |       | R>L (11) |         |       |        |                    |        |

### Supplementary Table 1. Clinical characteristics of 13 FTD patients carrying I383V TARDBP variant.

Patients are numbered according to their ID in the pedigrees (Figure 1 / Supplementary Figure 1). Four out of 13 patients have died (disease duration marked with asterisk), whereas current disease duration is presented for the nine living patients. *Clinical diagnoses*: bvFTD = behavioral variant of FTD; svPPA = semantic variant of primary progressive aphasia. *Clinical symptoms*: - = absent; ± = mild; + = moderate; ++ = severe. *Neuroimaging*: R = right; L = left; S = symmetric. The numbers in brackets indicate the number of years after symptom onset when neuroimaging was performed.

<sup>a</sup> Neuropathologic examination.

<sup>b</sup> Goldman score based on family history (up till 2<sup>nd</sup> degree).

<sup>c</sup> Computed tomography (CT) was performed instead of Magnetic Resonance Imaging (MRI).

|                                              | 1B     | 3I             | 3J     | 5N     |
|----------------------------------------------|--------|----------------|--------|--------|
| <b>Gender</b>                                | M      | F              | F      | M      |
| <b>Age at onset</b>                          | 39     | 53             | 59     | 62     |
| <b>Disease duration (years)</b>              | 6*     | 6              | 9*     | 1*     |
| <b>Clinical diagnosis</b>                    | ALS    | PSMA           | ALS    | ALS    |
| <b>Clinical symptoms</b>                     |        |                |        |        |
| <i>Onset</i>                                 | Spinal | Spinal         | Spinal | Spinal |
| <i>EMG affected regions (N)<sup>a</sup></i>  | 1      | 0 <sup>d</sup> | 2      | 3      |
| <i>Diagnostic delay (months)<sup>b</sup></i> | 12     | 64             | 24     | 8      |
| <i>Cognitive impairment</i>                  | -      | -              | -      | -      |
| <b>Family history<sup>c</sup></b>            |        |                |        |        |
| <i>Goldman score</i>                         | 1      | 5              | 5      | 5      |
| <i>Psychiatric Family history</i>            | -      | -              | -      | -      |

**Supplementary Table 2. Clinical characteristics of four ALS patients carrying I383V *TARDBP* variant.**

Patients are numbered according to their ID in the pedigrees (Figure 1 / Supplementary Figure 1). Three patients have died (disease duration marked with asterisk), whereas current disease duration is presented for patient 3I. Neuroimaging was not performed in these patients. *Clinical diagnoses*: ALS = amyotrophic lateral sclerosis; PSMA = progressive spinal muscular atrophy.

<sup>a</sup> Number of regions with features consistent with ALS according to the revised El Escorial criteria.<sup>1</sup>

<sup>b</sup> The diagnostic delay is presented to indicate the relative slow progression in patients 3I and 3J.

<sup>c</sup> Goldman score based on family history (up till 2<sup>nd</sup> degree).

<sup>d</sup> Denervation and reinnervation changes were present, though not fulfilling El Escorial criteria.

| Authors                                    | Number of patients (families) | Age at onset | Clinical Diagnosis | Predominant atrophy distribution              | Family history  |
|--------------------------------------------|-------------------------------|--------------|--------------------|-----------------------------------------------|-----------------|
| Ramos et al., 2020 <sup>2</sup>            | 4 (2)                         | ND           | FTD                | ND                                            | Positive        |
|                                            |                               | 60           | bvFTD              | Temporal (left>right)                         | Negative        |
| Ramos et al., 2019 <sup>3</sup>            | 3 (3)                         | 58           | svPPA              | Temporal (bilateral) + Frontal                | Positive        |
|                                            |                               | 66           | svPPA              | Temporal (left>right) + Frontal               | Positive        |
| Gelpi et al., 2014 <sup>4</sup>            | 1 (1)                         | 60           | svPPA              | Temporal (left, bilateral at autopsy)         | Dementia        |
|                                            |                               | 65           | bvFTD-ALS          | Temporal (bilateral) + Parietal (mild)        | ALS             |
| Caroppo et al., 2016 <sup>5</sup>          | 4 (3)                         | 63           | bvFTD              | Temporal (bilateral) + Frontal                | bvFTD           |
|                                            |                               | 51           | bvFTD              | Temporal (right>left) + Frontal + Hippocampal | bvFTD           |
|                                            |                               | 51           | svPPA              | Temporal (left>right)                         | Negative        |
|                                            |                               | 38           | ALS                | No atrophy                                    | FTD, ALS        |
| Cheng et al., 2016 <sup>6</sup>            | 3 (1)                         | 64           | svPPA              | Temporal (left>right)                         | FTD, ALS        |
|                                            |                               | 62           | bvFTD-ALS          | Temporal (bilateral) + Frontal                | FTD, ALS        |
| Coyle-Gilchrist et al., 2016 <sup>7</sup>  | 1 (1)                         | 49           | svPPA              | Temporal (bilateral)                          | Unknown         |
|                                            |                               | 51           | svPPA              | Temporal (left>right)                         | dementia, ALS   |
| Gonzalez-Sanchez et al., 2018 <sup>8</sup> | 2 (1)                         | 52           | ALS                | ND                                            | dementia, svPPA |
| Rutherford et al., 2008 <sup>9</sup>       | 1 (1)                         | 59           | ALS                | ND                                            | ALS             |
|                                            |                               | 66           | ALS                | ND                                            | ALS             |
| Ticozzi et al., 2011 <sup>10</sup>         | 3 (1)                         | 25           | ALS                | ND                                            | ALS             |
|                                            |                               | 57           | ALS                | ND                                            | ALS             |
|                                            |                               | 42           | ALS                | ND                                            | ALS             |
| Ozoguz et al., 2015 <sup>11</sup>          | 2 (1)                         | 47           | ALS                | ND                                            | ALS             |

### Supplementary Table 3. Clinical characteristics of previously reported patients carrying the I383V *TARDBP* variant.

A total of 24 patients with the I383V variant from 17 different families have been reported in the literature. Eight of these patients were diagnosed with isolated ALS, whereas the majority was diagnosed with FTD or FTD-ALS. Neuroimaging of most FTD patients described the presence of temporal atrophy, in some cases combined with volume loss in other areas. *Clinical diagnoses*: ALS = amyotrophic lateral sclerosis; svPPA = semantic variant of primary progressive aphasia; bvFTD = behavioral variant of FTD. ND = not described.

## References

1. Brooks BR, Miller RG, Swash M, Munsat TL, World Federation of Neurology Research Group on Motor Neuron D. El Escorial revisited: revised criteria for the diagnosis of amyotrophic lateral sclerosis. *Amyotroph Lateral Scler Other Motor Neuron Disord* 2000;1:293-299.
2. Ramos EM, Dokuru DR, Van Berlo V, et al. Genetic screening of a large series of North American sporadic and familial frontotemporal dementia cases. *Alzheimers Dement* 2020;16:118-130.
3. Ramos EM, Koros C, Dokuru DR, et al. Frontotemporal dementia spectrum: first genetic screen in a Greek cohort. *Neurobiol Aging* 2019;75:224 e221-224 e228.
4. Gelpi E, van der Zee J, Turon Estrada A, Van Broeckhoven C, Sanchez-Valle R. TARDBP mutation p.Ile383Val associated with semantic dementia and complex proteinopathy. *Neuropathol Appl Neurobiol* 2014;40:225-230.
5. Caroppo P, Camuzat A, Guillot-Noel L, et al. Defining the spectrum of frontotemporal dementias associated with TARDBP mutations. *Neurol Genet* 2016;2:e80.
6. Cheng YW, Lee MJ, Chen TF, et al. A single nucleotide TDP-43 mutation within a Taiwanese family: A multifaceted demon. *Amyotroph Lateral Scler Frontotemporal Degener* 2016;17:292-294.
7. Coyle-Gilchrist IT, Dick KM, Patterson K, et al. Prevalence, characteristics, and survival of frontotemporal lobar degeneration syndromes. *Neurology* 2016;86:1736-1743.
8. Gonzalez-Sanchez M, Puertas-Martin V, Esteban-Perez J, et al. TARDBP mutation associated with semantic variant primary progressive aphasia, case report and review of the literature. *Neurocase* 2018;24:301-305.
9. Rutherford NJ, Zhang YJ, Baker M, et al. Novel mutations in TARDBP (TDP-43) in patients with familial amyotrophic lateral sclerosis. *PLoS Genet* 2008;4:e1000193.
10. Ticozzi N, LeClerc AL, van Blitterswijk M, et al. Mutational analysis of TARDBP in neurodegenerative diseases. *Neurobiol Aging* 2011;32:2096-2099.
11. Ozoguz A, Uyan O, Birdal G, et al. The distinct genetic pattern of ALS in Turkey and novel mutations. *Neurobiol Aging* 2015;36:1764 e1769-1764 e1718.
